# Supplementary material for: Morbillivirus and Pilot Whale Deaths, Canary Islands, Spain, 2015
Source: PubMed Central journal article supplement (PMC4806956; doi:10.3201/eid2204.150954), 2016-04
Supplement: 15-0954-Techapp-s1.pdf [file 15-0954-Techapp-s1.pdf]

# Morbillivirus and Pilot Whale Deaths, Canary Islands, Spain

## Technical Appendix

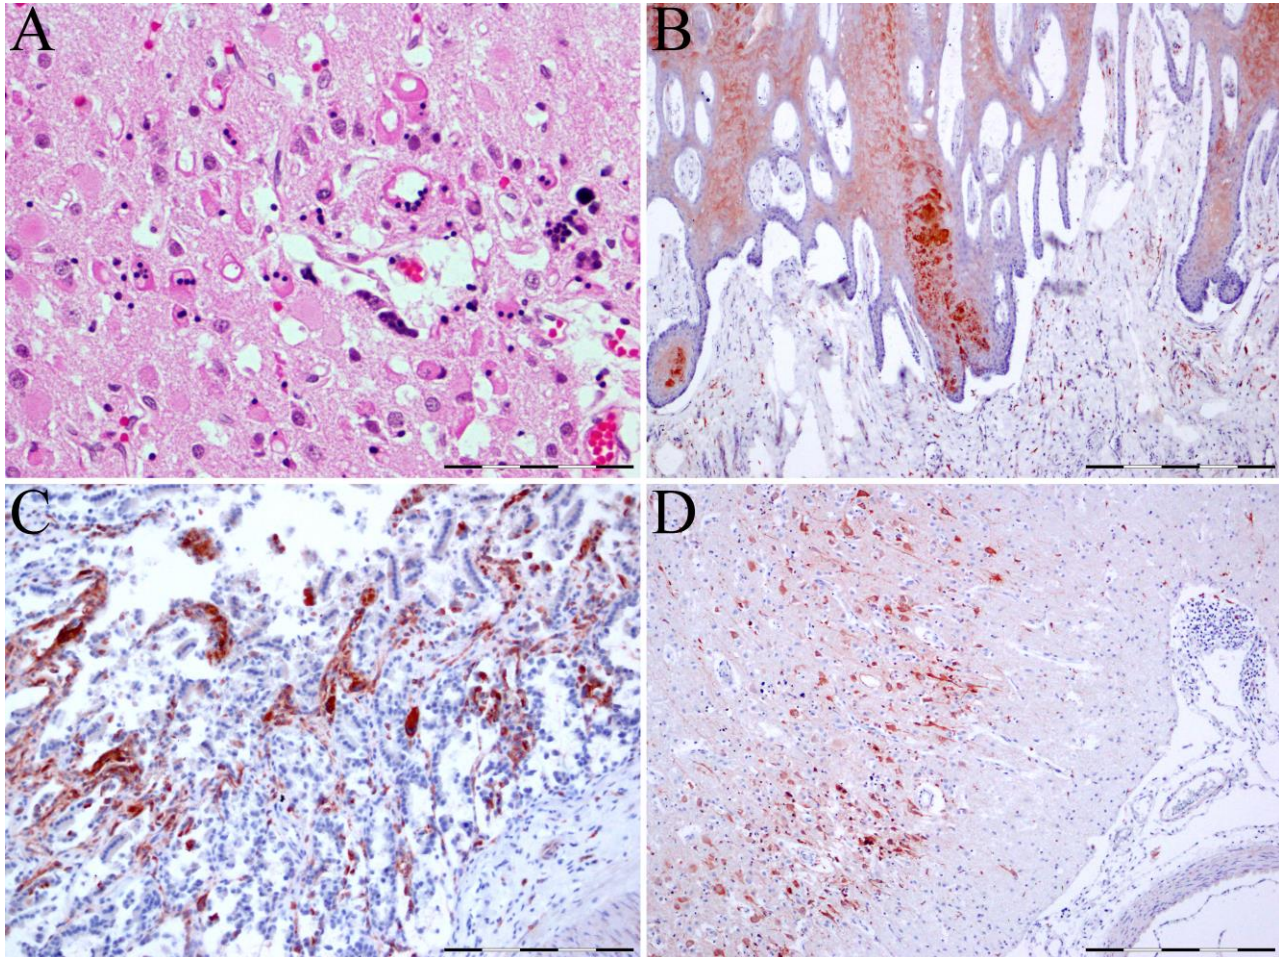

**Technical Appendix Figure.** Microscopic images of tissue samples from 2 short-finned pilot whales (*Globicephala macrorhynchus*) from the eastern Atlantic Ocean stranded along the Canary Islands, Spain, 2015. A) Brain of animal 2 showing degenerate neurons with cytoplasmic vacuolation, eccentric nuclei, and chromatolysis. Nuclear pyknosis is present in degenerating necrotic neurons (hematoxylin and eosin stained). Scale bar = 50  $\mu$ m. B) First compartment of the stomach of animal 1 showing intense immunoperoxidase staining of morbillivirus in cytoplasm and nuclei of hyperplastic epithelial cells of the keratinized stomach. Clusters of neutrophils were present at different layers of the hyperkeratotic epithelium (avidin–biotin–peroxidase stained and Harris hematoxylin counterstained). Scale bar = 200  $\mu$ m. C) Intestine of animal 1 showing intense immunoperoxidase staining of morbillivirus in cytoplasm and nuclei of epithelial and syncytial cells

(avidin–biotin–peroxidase stained and Harris hematoxylin counterstained). Scale bar = 100  $\mu\text{m}$ . D) Brain of animal 2 showing intense immunostaining (neurons, glial cells, and neuronal processes) mainly confined to gray matter of cerebral cortex (avidin–biotin–peroxidase stained and Harris hematoxylin counterstained). Scale bar = 200  $\mu\text{m}$ .
